# Supplementary material for: Machine learning-based viewers’ preference prediction on social awareness advertisements using EEG
Source: Frontiers journal article supplement (doi:10.3389/fnhum.2025.1542574), 2025-06-13
Supplement: Data_Sheet_1.pdf [file Data_Sheet_1.pdf]

| Index | Feature Name                           | Feature Description                                                          |
|-------|----------------------------------------|------------------------------------------------------------------------------|
| f1    | Average power                          | Average power of EEG using PSD and Welch's method                            |
| f2    | Relative power                         | Ratio of Band power to total power                                           |
| f3    | Hjorth Mobility                        | Hjorth feature                                                               |
| f4    | Hjorth Complexity                      | Hjorth Feature                                                               |
| f5    | Skewness                               | Symmetry of EEG signal                                                       |
| f6    | Kurtosis                               | How much tailed the probability distribution of EEG signal                   |
| f7    | Normalized First Difference            | Self-similarities by one sample point                                        |
| f8    | Normalized Second Difference           | Self-similarities by two sample points                                       |
| f9    | Arithmetic Mean                        | Mean of EEG signal                                                           |
| f10   | Median Value                           | Median of EEG signal                                                         |
| f11   | Maximum Value                          | Highest point of EEG signal                                                  |
| f12   | Minimum Value                          | Lowest point of EEG signal                                                   |
| f13   | Absolute Value of Square Root          | Summation of square root of absolute EEG signal                              |
| f14   | Modified Mean Absolute Value           | Mean absolute value of EEG signal                                            |
| f15   | Interquartile Range                    | Difference between 75th percentiles & 25th percentiles                       |
| f16   | Difference Variance Value              | Difference between neighboring samples' variance value                       |
| f17   | Difference Absolute Standard Deviation | Absolute value of difference between neighboring samples' standard deviation |
| f18   | Mean Teager Energy                     | Mean of non-linear energy                                                    |
| f19   | Log Energy Entropy                     | Non-normalized energy entropy                                                |
| f20   | Renyi Entropy                          | Non-linear entropy of signal                                                 |
| f21   | Standard deviation                     | Standard deviation from mean                                                 |
| f22   | Threshold Crossing                     | Threshold value crossing frequency                                           |
| f23   | Zero Crossing                          | Sign change frequency                                                        |
| f24   | Coefficient of Variation               | Dispersion Measurement                                                       |
| f25   | Log Coefficient of Variation           | Logarithmic dispersion Measurement                                           |
| f26   | Slope Sign Change                      | Slope sign change frequency                                                  |
| f27   | Absolute Value of Cube                 | Sum of cube of absolute EEG                                                  |
| f28   | Log Detector                           | Non-linear natural exponential measurement                                   |
| f29   | Cardinality                            | Number of distinct values                                                    |
| f30   | Detrend fluctuation analysis           | Non-linear parameter of auto-correlation properties                          |
| f31   | Spectral Centroid                      | Barycenter of the spectrum                                                   |
| f32   | Spectral Spread                        | Distribution of the spectrum around its average value                        |
| f33   | Spectral Skewness                      | Measures of asymmetric distribution around signal's mean                     |
| f34   | Spectral Kurtosis                      | Flatness distribution of spectrum around its mean value                      |
| f35   | Spectral Entropy                       | Peakedness distribution of the spectrum                                      |
| f36   | Spectral Flatness                      | Noise like nature of the spectrum                                            |
| f37   | Spectral Crest                         | Sinusoidality of the spectrum                                                |
| f38   | Spectral Flux                          | Power spectrum change measurement                                            |
| f39   | Spectral Slope                         | Linear decreasing of the spectral amplitude                                  |
| f40   | Spectral Decrease                      | Decreasing of the spectral amplitude                                         |
| f41   | Spectral Rolloff Point                 | 95th percentile of the spectral power distribution                           |
